# Supplementary material
Source: publisher figshare collection journal article supplement (https://sage.figshare.com/ndownloader/files/23297009)
Supplement: Supplementary file 1 [file 23297009]

**Table S1.** Risks of asthma according to exposure to cat and dog in case-control studies

| Study              | Population | Exposure  | Cat              | Dog              | Quality <sup>†</sup> |
|--------------------|------------|-----------|------------------|------------------|----------------------|
| Strachan 1995      | Children   | Ownership | 1.64 (1.09–2.47) | 1.27 (0.85–1.89) | 7                    |
| Gelber 1993        | Adults     | Allergen  | 1.22 (0.33–4.52) | –                | 8                    |
| Lindfors 1995      | Children   | Ownership | 0.76 (0.55–1.05) | 0.93 (0.67–1.29) | 9                    |
| Wickens 1999       | Children   | Ownership | 1.42 (0.97–2.08) | –                | 7                    |
| Addo-Yobo 2001     | Children   | Allergen  | 1.69 (0.68–4.20) | –                | 7                    |
| Gehring 2001       | Adults     | Allergen  | 1.59 (0.35–7.08) | –                | 7                    |
| Zheng 2002         | Children   | Ownership | 1.2 (0.7–2.0)    | 1.3 (0.9–1.7)    | 8                    |
| El-Sharif 2003     | Children   | Allergen  | –                | 3.24 (1.09–9.56) | 7                    |
| Moraes 2001        | Children   | Allergen  | 0.23 (0.10–0.51) | –                | 7                    |
| Al-Mousawi 2004    | Children   | Ownership | 3.67 (3.60–3.74) | –                | 7                    |
| Lin 2012           | Children   | Allergen  | 1.96 (1.13–3.39) | 1.89 (1.10–3.22) | 8                    |
| Medjo 2013         | Children   | Ownership | 2.14 (0.48–9.37) | 0.94 (0.25–3.61) | 8                    |
| Toppila-Salmi 2015 | Children   | Allergen  | 2.96(1.33–6.62)  | 3.15(1.52–6.52)  | 9                    |

<sup>†</sup>Quality Scored according to Newcastle Ottawa Quality Assessment Scale-Case Control Studies.
